# Supplementary material
Source: publisher site journal article supplement (https://www.dovepress.com/article/374291)
Supplement: Supplementary file 1 [file get_supplementary_file.php]

**Supplementary Table 1**: Detail distribution of the causes to the drug-related problem domains

| Problem | C1.1 | C1.2 | C1.3 | C1.4 | C1.6 | C1.7 | C2.1 | C3.1 | C3.2 | C3.5 | C4.1 | C4.2 | C5.3 | C5.4 |
| --- | --- | --- | --- | --- | --- | --- | --- | --- | --- | --- | --- | --- | --- | --- |
| P1.1 | 0 | 0 | 2 | 0 | 2 | 0 | 0 | 3 | 1 | 0 | 1 | 1 | 0 | 1 |
| P1.2 | 13 | 6 | 3 | 24 | 2 | 0 | 3 | 36 | 7 | 0 | 8 | 15 | 1 | 12 |
| P1.3 | 1 | 0 | 1 | 0 | 4 | 0 | 0 | 2 | 1 | 1 | 1 | 1 | 0 | 0 |
| P2.1 | 0 | 0 | 1 | 28 | 0 | 4 | 1 | 0 | 35 | 3 | 0 | 2 | 13 | 3 |
| P3.2 | 2 | 0 | 2 | 0 | 0 | 0 | 0 | 0 | 1 | 0 | 0 | 2 | 1 | 0 |
| P3.3 | 0 | 0 | 1 | 0 | 0 | 0 | 0 | 0 | 0 | 0 | 0 | 0 | 0 | 0 |
| Total no of causes | 16 | 6 | 10 | 52 | 8 | 4 | 4 | 41 | 45 | 4 | 10 | 21 | 15 | 16 |

| Poblem | C6.1 | C6.2 | C6.3 | C6.4 | C6.5 | C6.6 | C7.1 | C7.2 | C7.5 | C7.6 | C7.9 | C7.10 | C9.1 | C9.2 | C9.3 |
| --- | --- | --- | --- | --- | --- | --- | --- | --- | --- | --- | --- | --- | --- | --- | --- |
| P1.1 | 1 | 0 | 0 | 0 | 0 | 2 | 0 | 0 | 0 | 0 | 0 | 0 | 4 | 0 | 0 |
| P1.2 | 21 | 4 | 0 | 1 | 1 | 1 | 22 | 0 | 16 | 1 | 1 | 1 | 51 | 9 | 0 |
| P1.3 | 2 | 1 | 0 | 0 | 0 | 0 | 2 | 0 | 0 | 0 | 0 | 0 | 3 | 0 | 0 |
| P2.1 | 13 | 0 | 17 | 0 | 0 | 0 | 1 | 14 | 15 | 1 | 0 | 0 | 30 | 8 | 0 |
| P3.2 | 2 | 0 | 0 | 0 | 0 | 0 | 0 | 0 | 0 | 0 | 0 | 0 | 2 | 0 | 0 |
| P3.3 | 0 | 0 | 0 | 0 | 0 | 0 | 0 | 0 | 0 | 0 | 0 | 0 | 3 | 0 | 1 |
| Total no of causes | 39 | 5 | 17 | 1 | 1 | 3 | 25 | 14 | 31 | 2 | 1 | 1 | 93 | 17 | 1 |
